# Supplementary material for: Energy dispersive anti-anharmonic effect in a Fano intervened semiconductor: revealed through temperature and wavelength-dependent Raman scattering
Source: Royal Society of Chemistry journal article supplement (doi:10.1039/d2cp04686e), 2022-12-16
Supplement: d2cp04686e1.pdf [file d2cp04686e1.pdf]

## **Supplementary Information**

Energy Dispersive Anti-anharmonic Effect in Fano Intervened Semiconductor:

Revealing through temperature and wavelength dependent Raman scattering

Chanchal Rani<sup>a</sup>, Suchita Kandpal<sup>a</sup>, Tanushree Ghosh<sup>a</sup>, Love Bansal<sup>a</sup>, Manushree Tanwar<sup>b,\*</sup>,

Rajesh Kumar<sup>a,\*</sup>

<sup>a</sup>Materials And Device Laboratory, Department of Physics, Indian Institute of Technology  
Indore, Simrol-453552, India

<sup>b</sup> Department of Chemistry, University of Pennsylvania, 231S. 34 Street Philadelphia, PA 19104-  
6323, USA

\* Email: [rajeshkumar@iiti.ac.in](mailto:rajeshkumar@iiti.ac.in) (Rajesh Kumar); [tmanu@sas.upenn.edu](mailto:tmanu@sas.upenn.edu) (Manushree Tanwar)

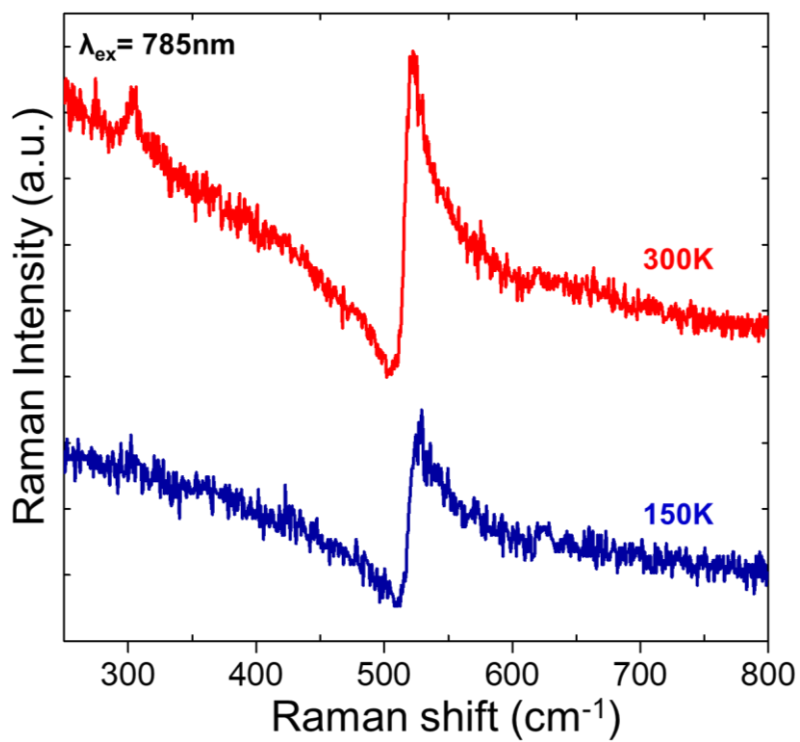

Figure S1: Experimentally observed Raman spectra at lowest temperature (150K) and room temperature (300K) recorded using 785nm excitation laser.

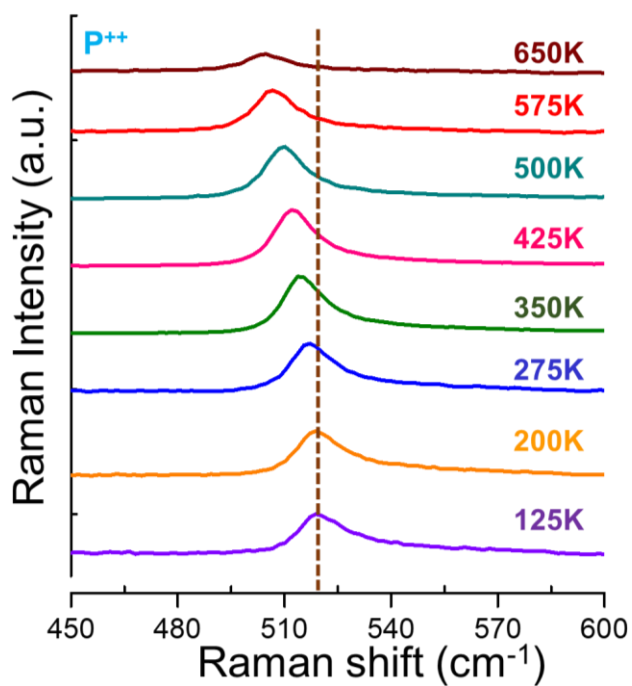

Figure. S2: Temperature-dependent Raman spectrum of heavily doped P<sup>++</sup> sample excited by 532 nm Laser.

❖ Analytical modelling:

The Raman spectra of heavily doped materials (silicon) gets effected by the strength of electron-phonon coupling which can be given as Eq1:

$$I(\omega) = \frac{(q+\varepsilon)^2}{(1+\varepsilon^2)} \quad (S1)$$

Where  $\varepsilon = \frac{(\omega-\omega_0)}{\Gamma/2}$ ,  $q$  is the strength of electron-phonon coupling and  $\Gamma$  is the linewidth of the Raman spectra.

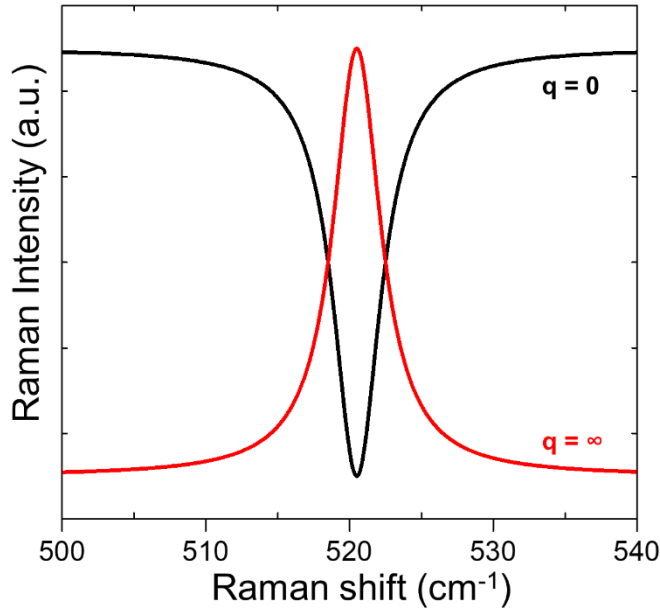

Figure. S3: Theoretical generated Raman line-shape for the different values of  $q$ , red and black spectra correspond to the zero and infinity, respectively.

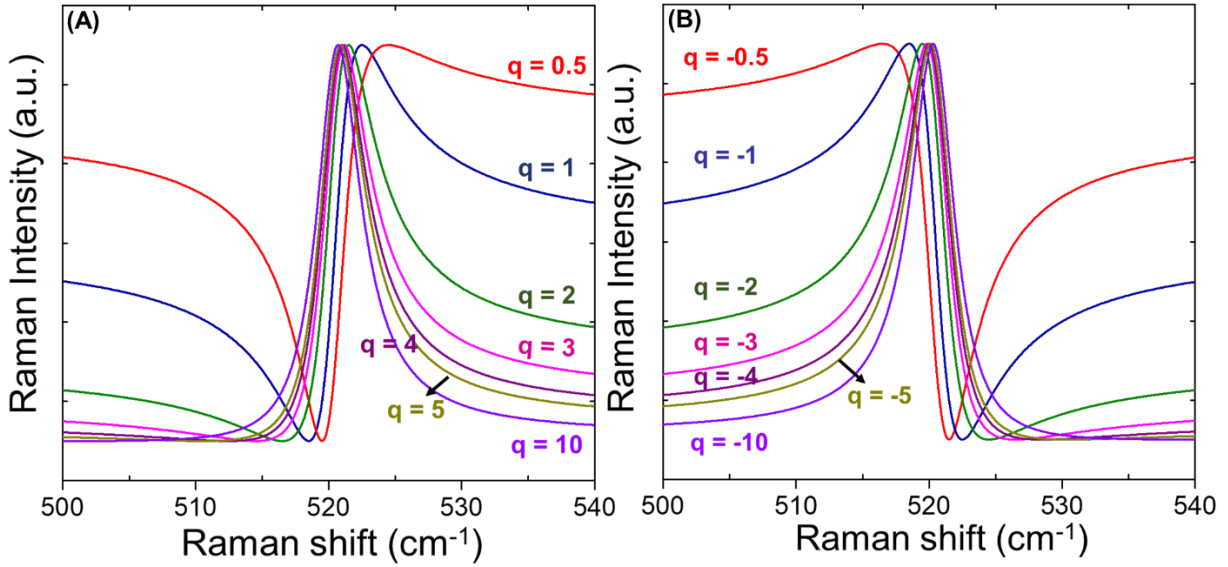

Figure. S4: Theoretical generated Raman line-shape for the different (positive & negative) values of electron-phonon coupling parameter  $q$ .

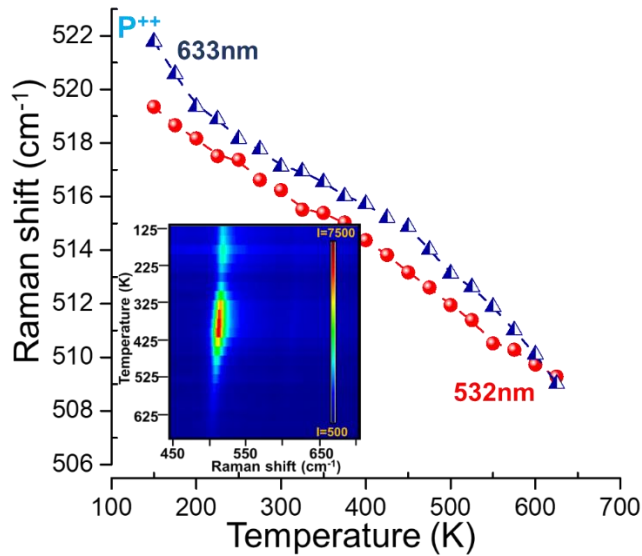

Figure. S5: Variation in Raman shift with temperature for  $P^{++}$  sample for different excitation wavelengths, blue curve is at 633 nm wavelength and red curve corresponds to 532 nm, respectively, inset shows the Raman thermal map.

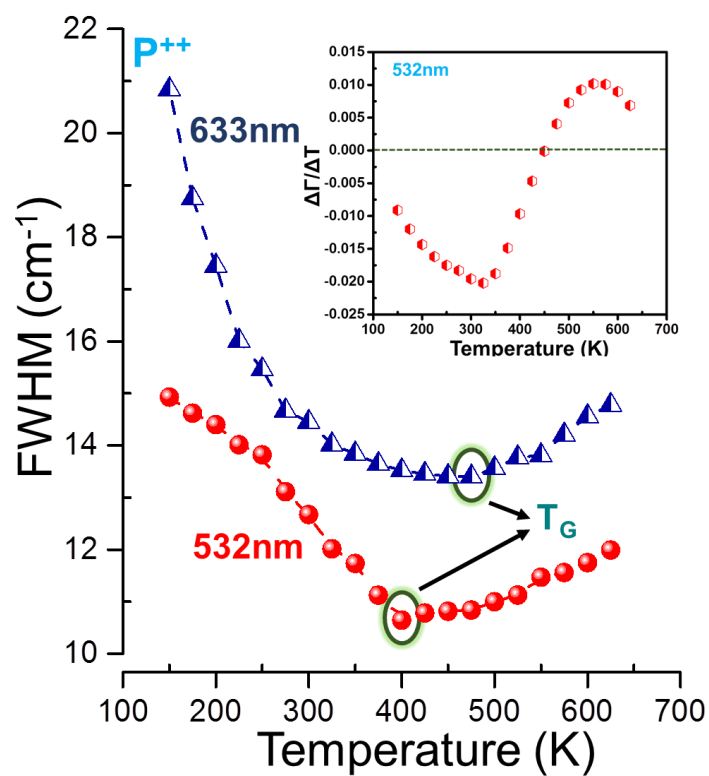

Figure. S6: Variation of Raman linewidth with temperature for heavily doped  $\text{P}^{++}$  sample at different wavelength, blue curve is at 633 nm wavelength and red curve corresponds to 532 nm, respectively, inset shows the slope of FWHM with temperature.
